# Supplementary material for: A conductive selenized polyacrylonitrile cathode in nucleophilic Mg2+/Li+ hybrid electrolytes for magnesium–selenium batteries
Source: Royal Society of Chemistry journal article supplement (doi:10.1039/c8ta04772c), 2018-01-01
Supplement: c8ta04772c1.pdf [file c8ta04772c1.pdf]

**A conductive selenized polyacrylonitrile cathode in  
nucleophilic  $Mg^{2+}/Li^+$  hybrid electrolytes for  
magnesium/selenium batteries**

Hancheng Yuan, Yuanying Yang, Yanna NuLi,\* Jun Yang and Jiulin Wang

Supporting Information

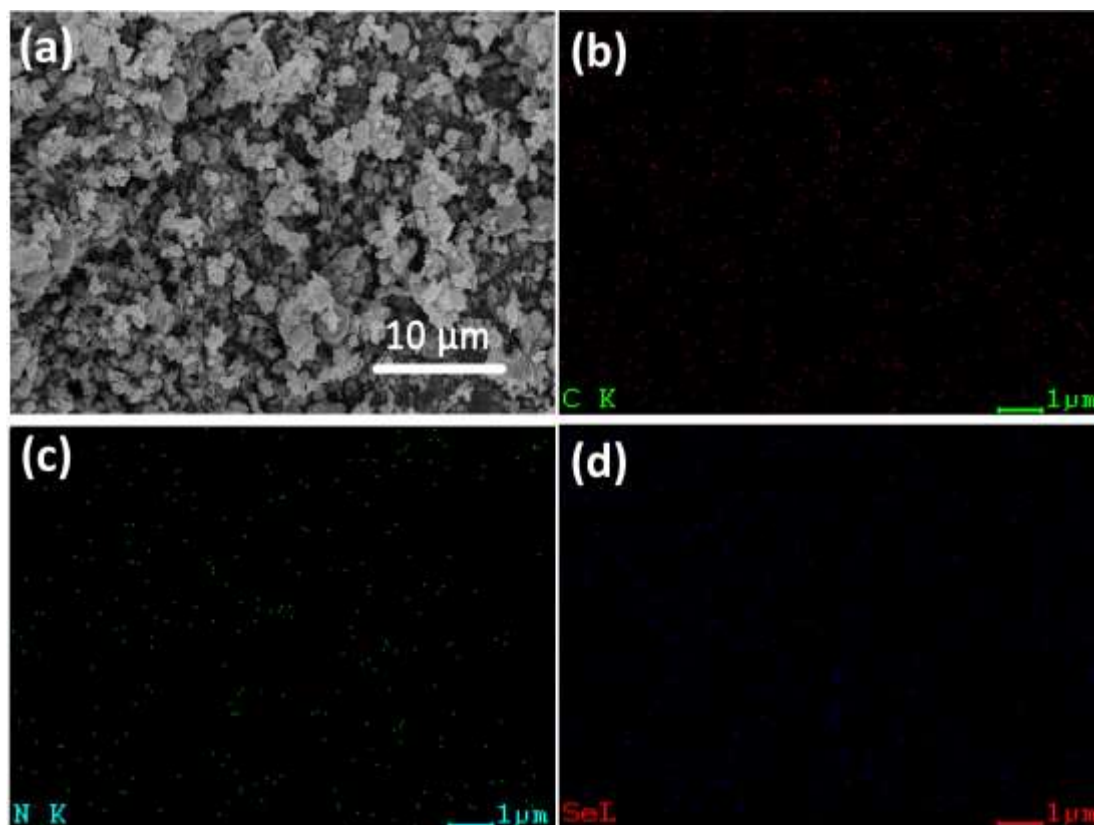

Figure S1. SEM image (a) and the corresponding C (b), N (c) and Se (d) elemental mappings of the Se/PAN composite prepared at 450 °C for 10h with 8:1 weight ratio of Se and PAN.

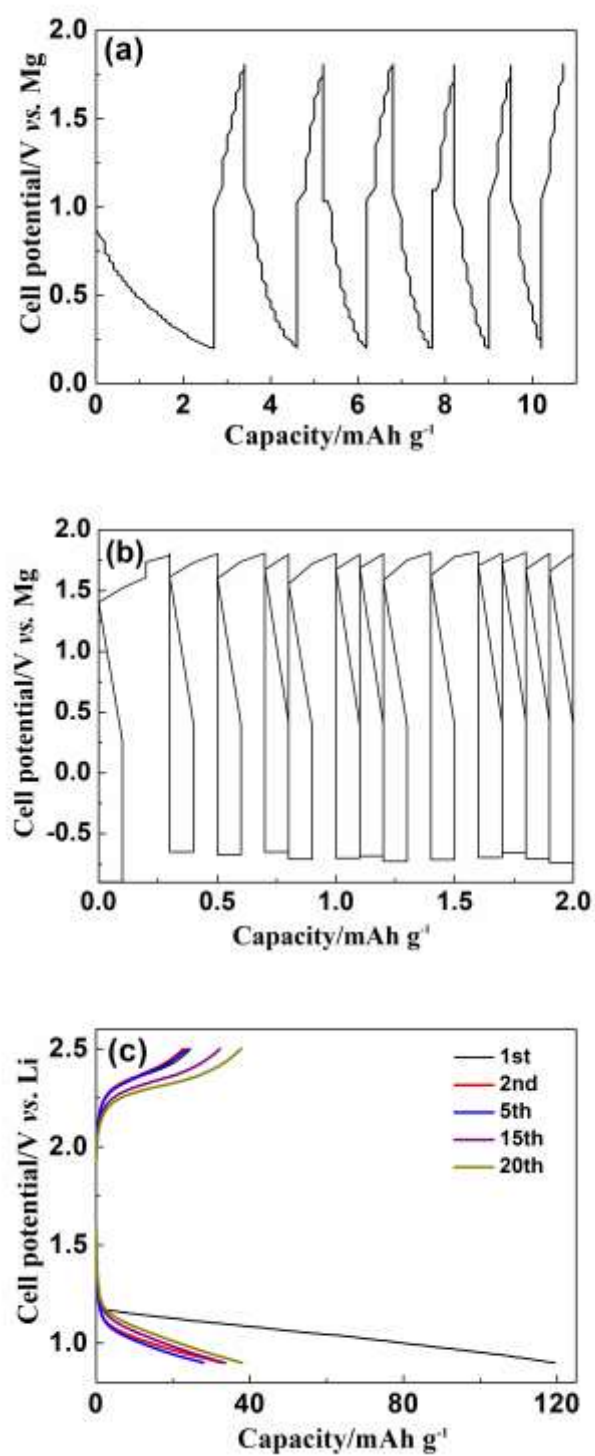

Figure S2. The discharge-charge curves at a rate of 50 mA g<sup>-1</sup> for Mg-Se/PAN cell with 0.4 mol L<sup>-1</sup> (PhMgCl)<sub>2</sub>·AlCl<sub>3</sub>/THF electrolyte (a), Mg-Se/PAN cell with 1.0 mol L<sup>-1</sup> LiCl/THF electrolyte (b), and Li-Se/PAN cell with 1.0 mol L<sup>-1</sup> LiCl/THF electrolyte (c), Se/PAN composite was prepared at 450 °C for 10h with 8:1 weight ratio of Se and PAN.

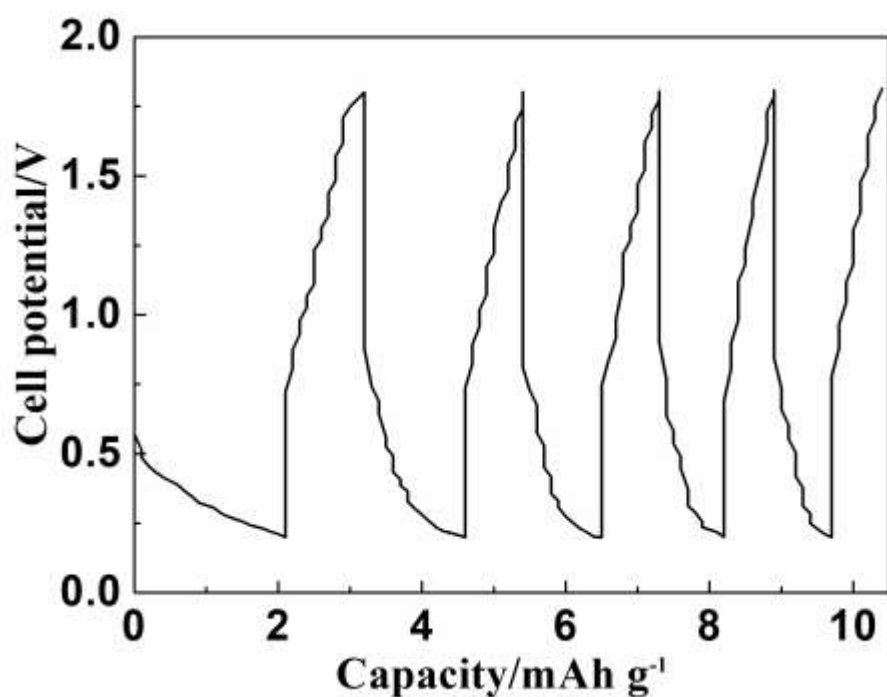

Figure S3. The discharge-charge curves of pyrolyzed PAN heated at 450 °C at a rate of 50 mA g<sup>-1</sup> in the electrolyte of 0.4 mol L<sup>-1</sup> (PhMgCl)<sub>2</sub>-AlCl<sub>3</sub>+1.0 mol L<sup>-1</sup> LiCl /THF.

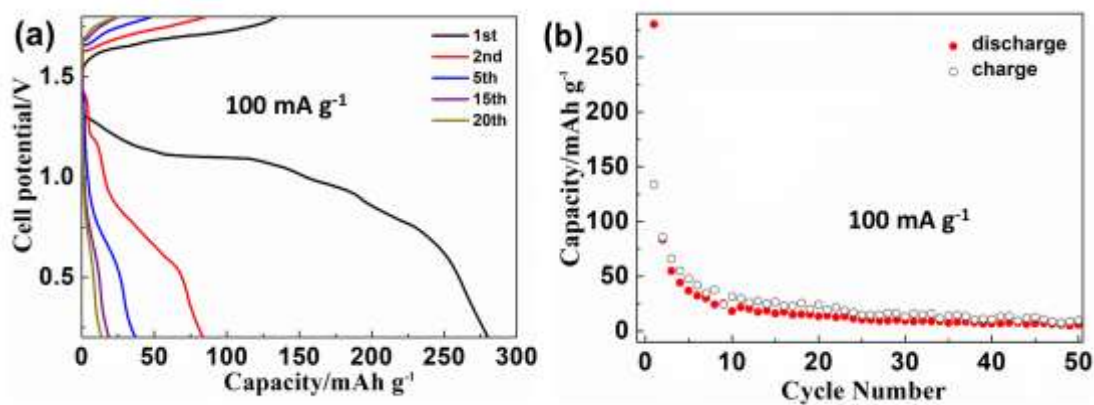

Figure S4. The discharge-charge curves (a) and corresponding cycling performance (b) at a rate of 100 mA g<sup>-1</sup> for pure Se in the electrolyte of 0.4 mol L<sup>-1</sup> (PhMgCl)<sub>2</sub>-AlCl<sub>3</sub>+1.0 mol L<sup>-1</sup> LiCl/THF.

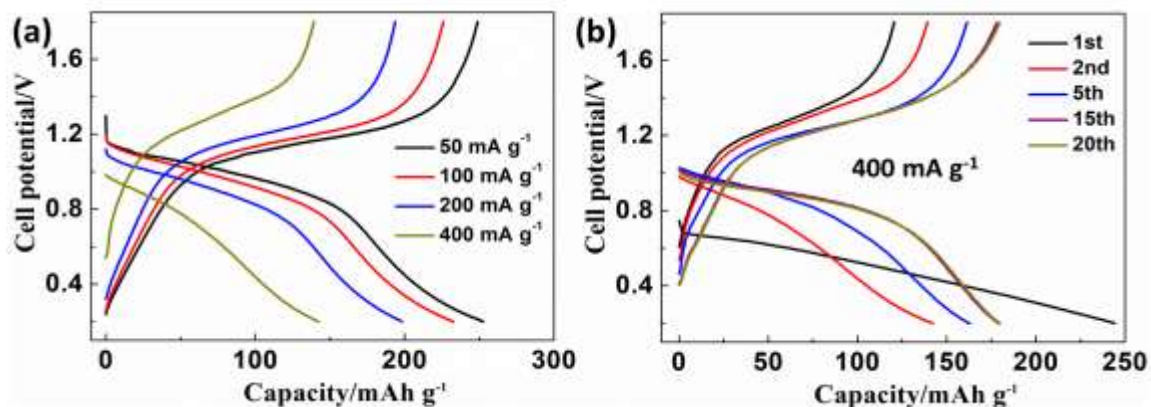

Figure S5. The discharge-charge curves for the second cycle at different current densities (a) and the discharge-charge curves for the 1st, 2nd, 5th, 15th, 20th cycles at a rate of  $400 \text{ mA g}^{-1}$  (b) of the Se/PAN composite prepared at  $450 \text{ }^\circ\text{C}$  for 10h with 8:1 weight ratio of Se and PAN in  $0.4 \text{ mol L}^{-1} (\text{PhMgCl})_2\text{-AlCl}_3 + 1.0 \text{ mol L}^{-1} \text{ LiCl/THF}$  electrolyte.

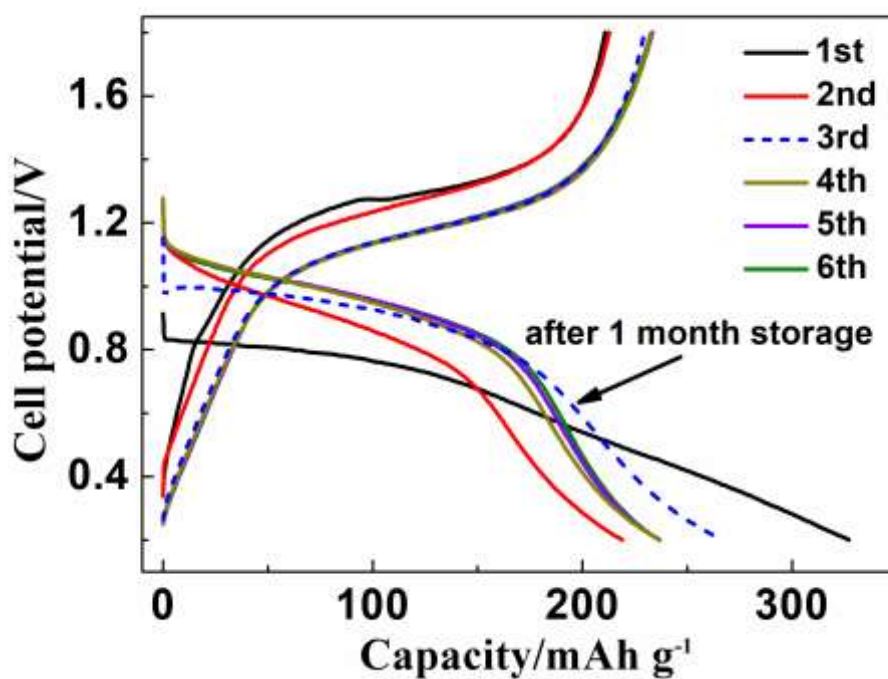

Figure S6. Self-discharge behaviour of the Mg-Se/PAN cell at a rate of  $50 \text{ mA g}^{-1}$  after 1 month storage in a fully charged state (the 2nd charged state).

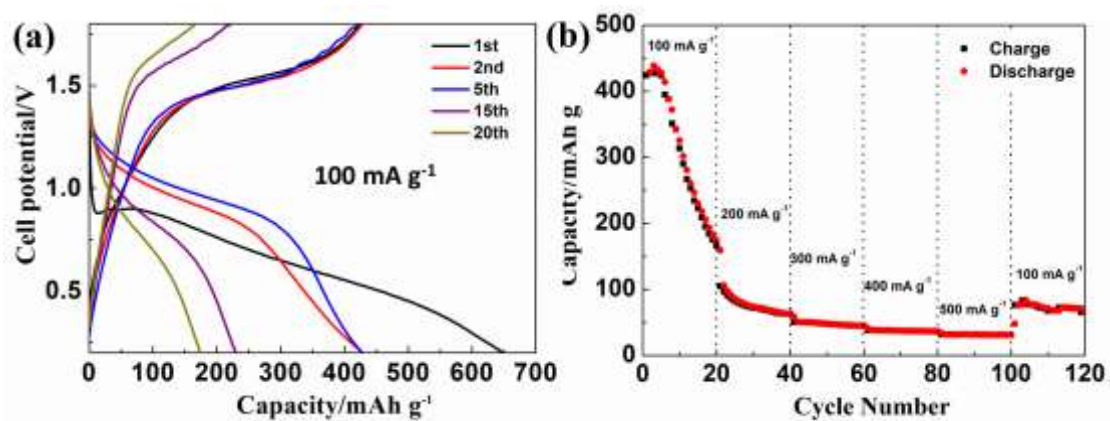

Figure S7. Discharge-charge profiles for S/PAN cathode at a rate of  $100 \text{ mA g}^{-1}$  (a), and the rate performance at various current densities from  $100 \text{ mA g}^{-1}$  to  $500 \text{ mA g}^{-1}$  (b). The electrolyte is  $0.4 \text{ mol L}^{-1} (\text{PhMgCl})_2\text{-AlCl}_3 + 1.0 \text{ mol L}^{-1} \text{ LiCl/THF}$ .

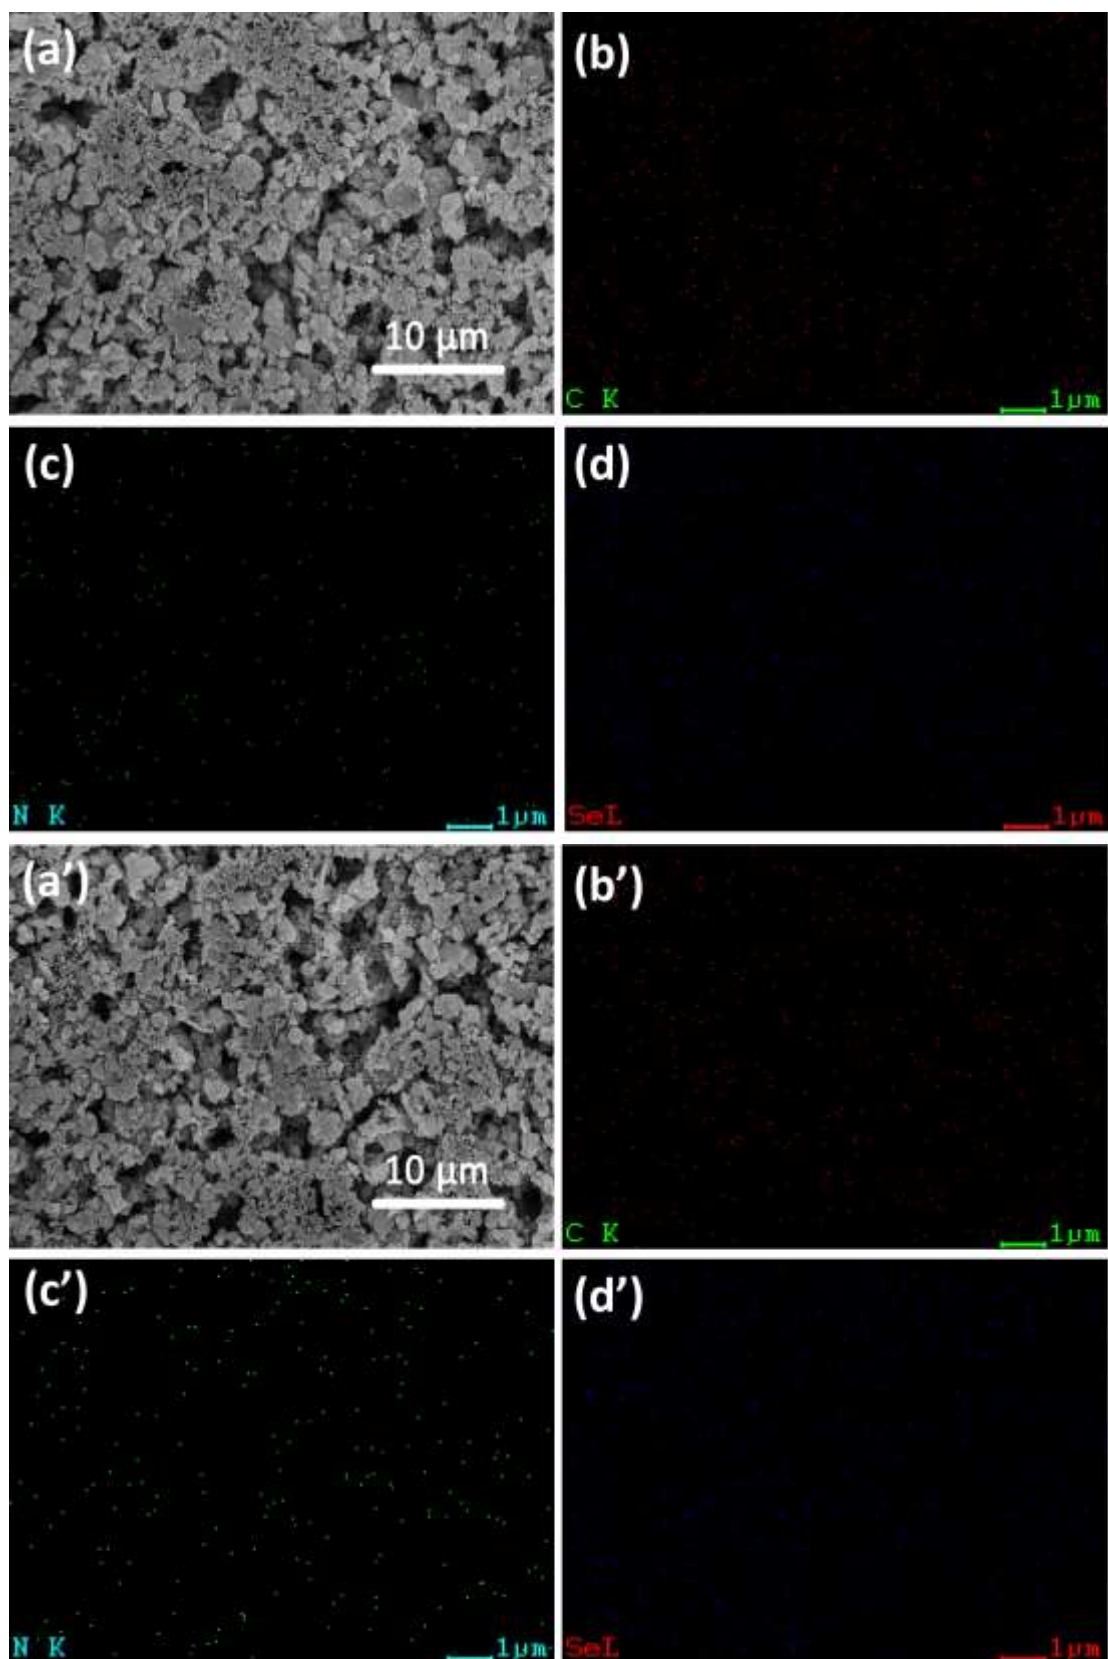

Figure S8. SEM images with corresponding C, N, Se mappings of Se/PAN cathodes before (a, b, c, d) and after 200 cycles (a', b', c', d') at a rate of 100 mA g<sup>-1</sup>.



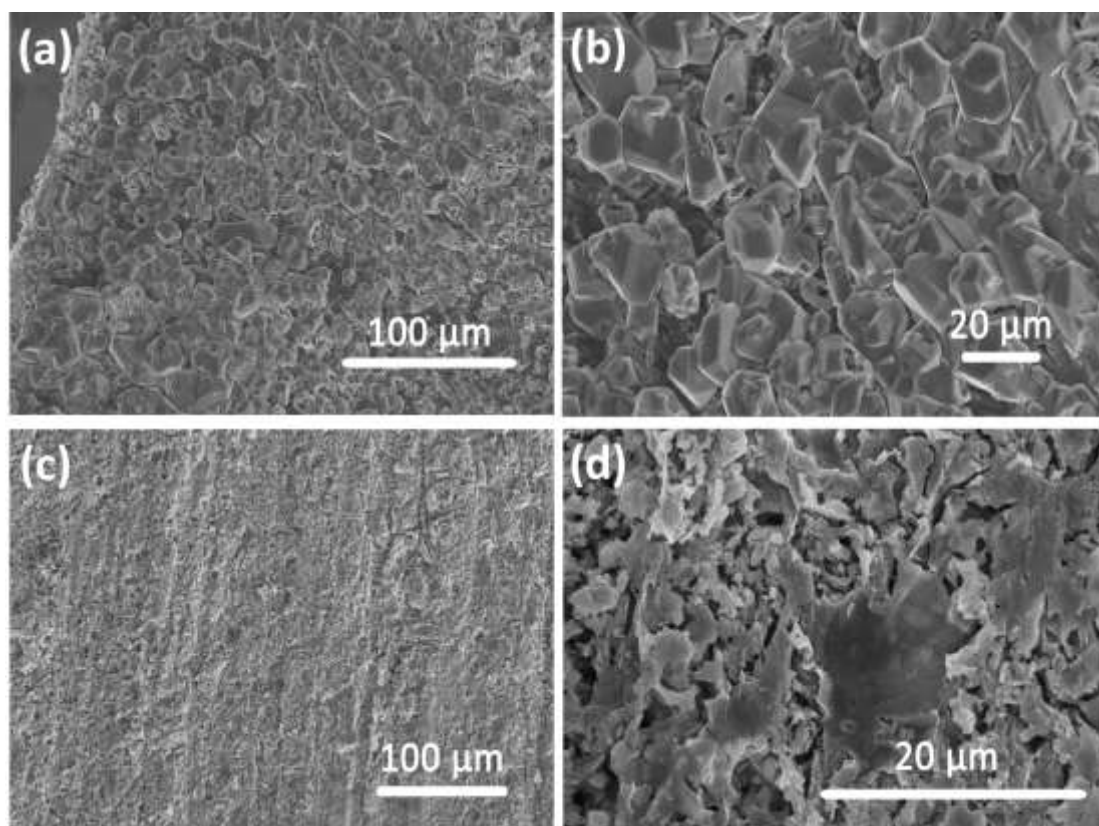

Figure S9. SEM images of Mg anodes after 40 cycles at a rate of 100 mA g<sup>-1</sup> (a) (b), and after 1000 cycles at a rate of 400 mA g<sup>-1</sup> (c) (d).

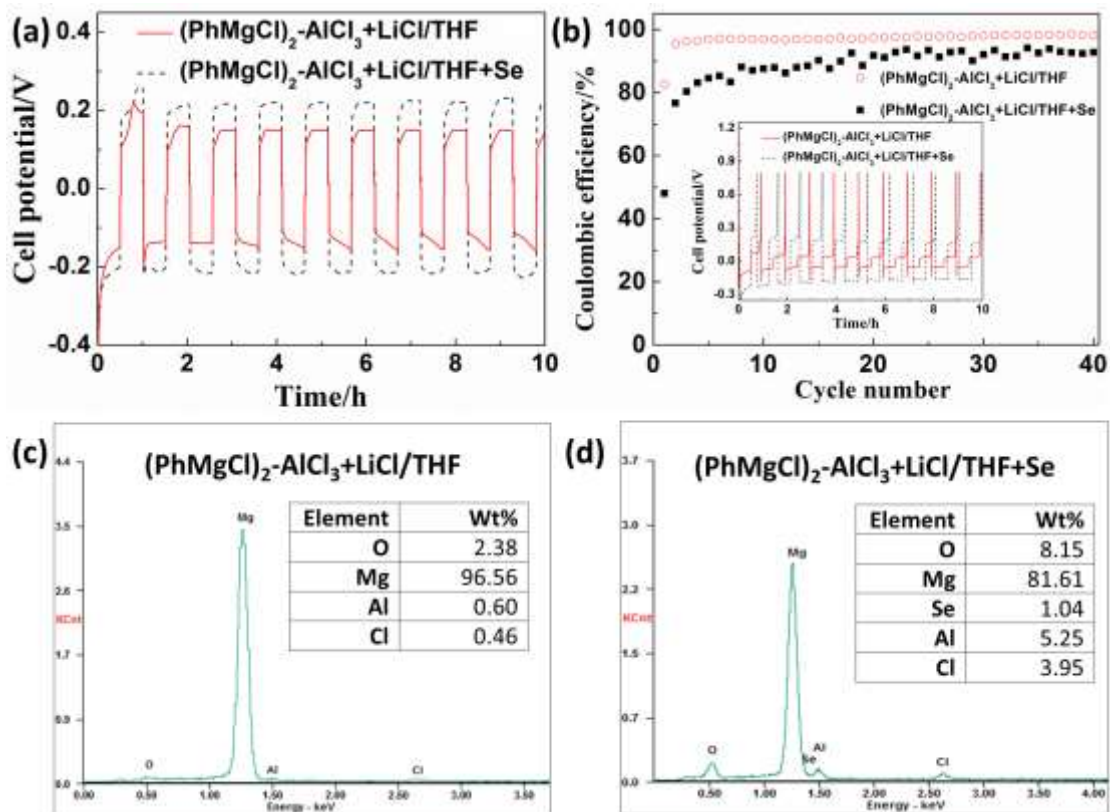

Figure S10. (a) The cycling curves of Mg deposition-dissolution at  $0.088 \text{ mA cm}^{-2}$  of Mg-Mg cells using the electrolytes of  $0.4 \text{ mol L}^{-1}$  (PhMgCl)<sub>2</sub>-AlCl<sub>3</sub>+ $1.0 \text{ mol L}^{-1}$  LiCl/THF and  $0.4 \text{ mol L}^{-1}$  (PhMgCl)<sub>2</sub>-AlCl<sub>3</sub>+ $1.0 \text{ mol L}^{-1}$  LiCl/THF dissolved with  $50 \text{ mmol L}^{-1}$  Se. Both discharge and charge are cut off at 30 min. (b) The cycling efficiencies of Mg deposition-dissolution at  $0.088 \text{ mA cm}^{-2}$  of SS-Mg cells using the electrolytes of  $0.4 \text{ mol L}^{-1}$  (PhMgCl)<sub>2</sub>-AlCl<sub>3</sub>+ $1.0 \text{ mol L}^{-1}$  LiCl/THF and  $0.4 \text{ mol L}^{-1}$  (PhMgCl)<sub>2</sub>-AlCl<sub>3</sub>+ $1.0 \text{ mol L}^{-1}$  LiCl/THF dissolved with  $50 \text{ mmol L}^{-1}$  Se. Discharge is cut off at 30 min and charge is cut off at 0.8 V, inset is the corresponding cycling curves of Mg deposition-dissolution. EDX spectra of Mg electrodes obtained from cycled cells in  $0.4 \text{ mol L}^{-1}$  (PhMgCl)<sub>2</sub>-AlCl<sub>3</sub>+ $1.0 \text{ mol L}^{-1}$  LiCl/THF electrolyte (c) and  $0.4 \text{ mol L}^{-1}$  (PhMgCl)<sub>2</sub>-AlCl<sub>3</sub>+ $1.0 \text{ mol L}^{-1}$  LiCl/THF dissolved with  $50 \text{ mmol L}^{-1}$  Se (d).



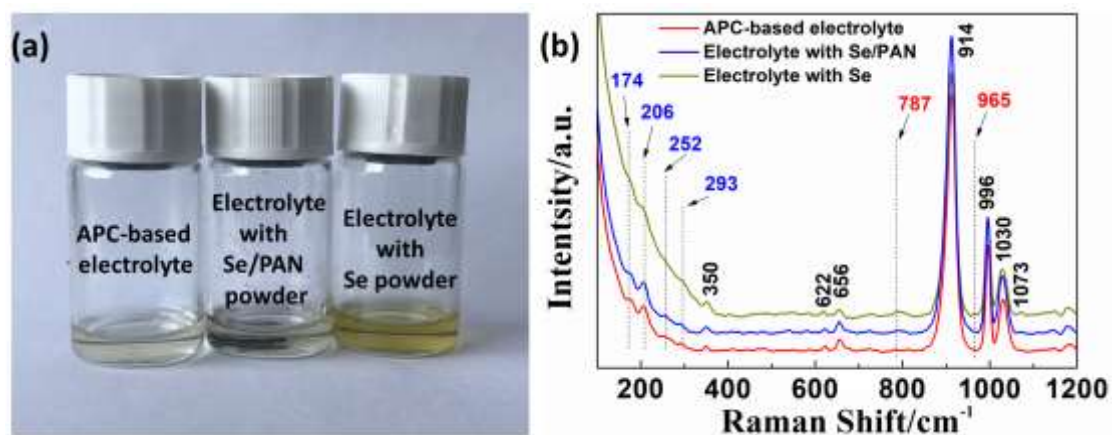

Figure S11. The photo (a) and Raman spectra (b) of  $0.4 \text{ mol L}^{-1} (\text{PhMgCl})_2\text{-AlCl}_3 + 1.0 \text{ mol L}^{-1} \text{LiCl/THF}$  electrolyte and the electrolytes after soaking Se/PAN and Se powders for about 48 h, respectively.

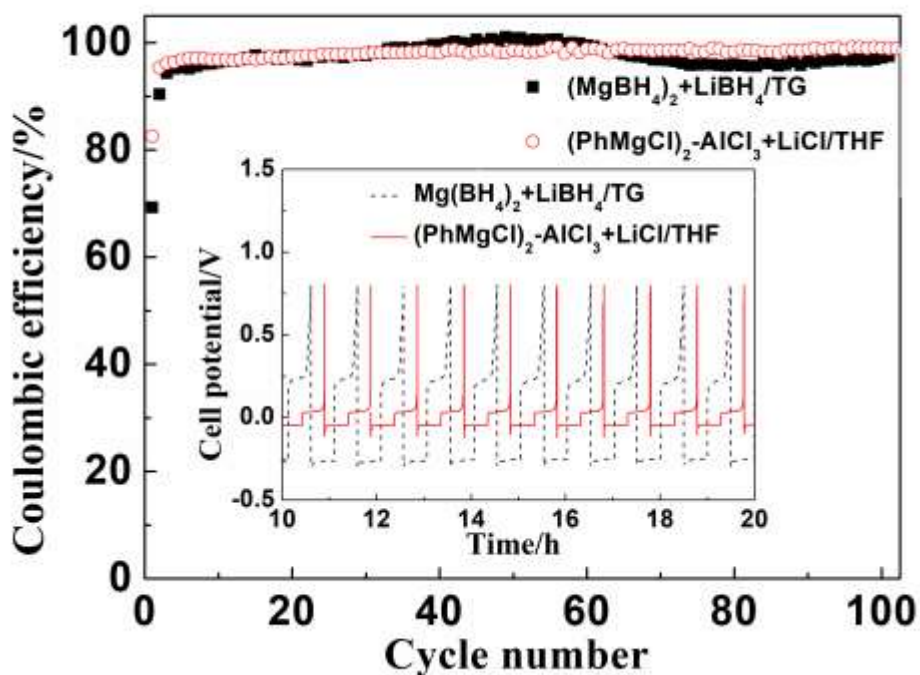

Figure S12. The cycling efficiencies of Mg deposition-dissolution on SS substrate at  $0.088 \text{ mA cm}^{-2}$  from  $0.5 \text{ mol L}^{-1} \text{Mg}(\text{BH}_4)_2 + 1.5 \text{ mol L}^{-1} \text{LiBH}_4/\text{TG}$  and  $0.4 \text{ mol L}^{-1} (\text{PhMgCl})_2\text{-AlCl}_3 + 1.0 \text{ mol L}^{-1} \text{LiCl/THF}$  electrolytes, inset is the cycling curves of Mg deposition-dissolution.

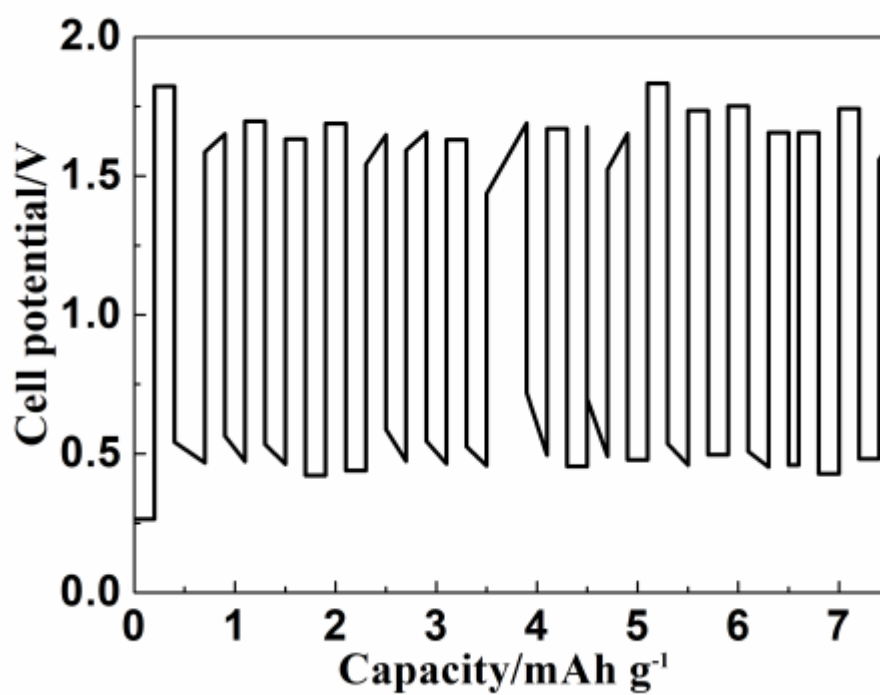

Figure S13. The discharge-charge curves at a rate of  $100 \text{ mA g}^{-1}$  for pure Se in the electrolyte of  $0.5 \text{ mol L}^{-1} \text{ Mg(BH}_4)_2 + 1.5 \text{ mol L}^{-1} \text{ LiBH}_4/\text{TG}$  electrolyte.

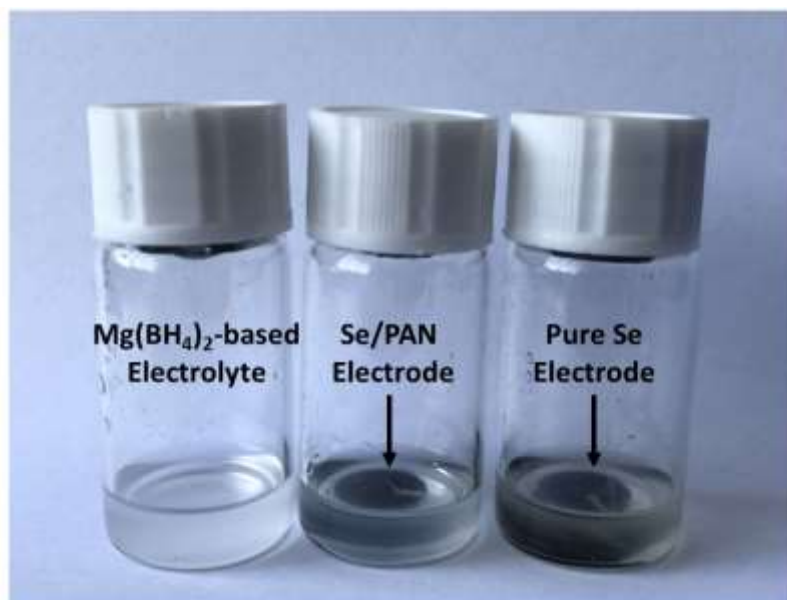

Figure S14. The photo of the  $0.5 \text{ mol L}^{-1} \text{ Mg(BH}_4)_2 + 1.5 \text{ mol L}^{-1} \text{ LiBH}_4/\text{TG}$  electrolyte, after soaking the Se/PAN electrode and Se electrode for about 5 min.

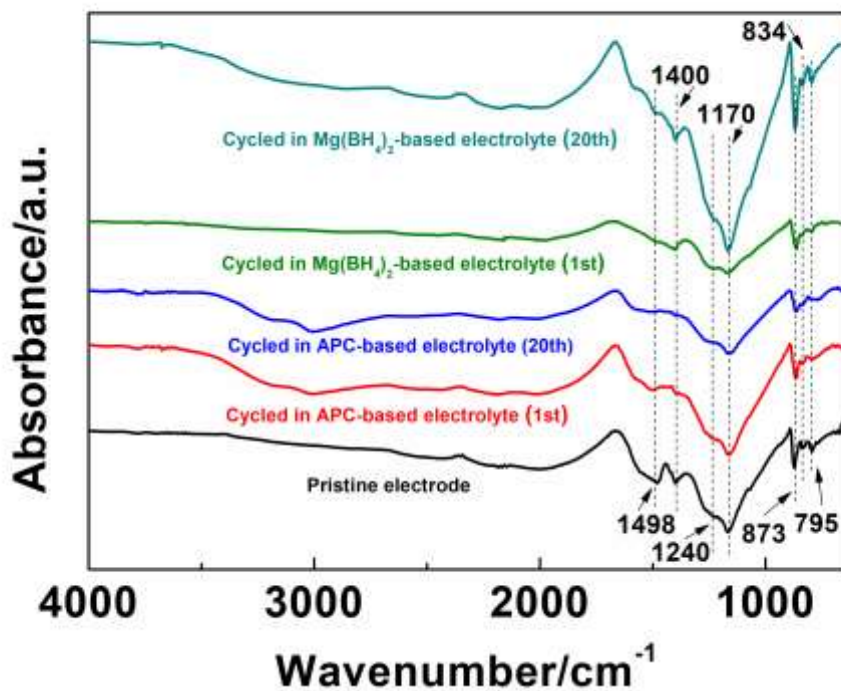

Fig. S15. FTIR spectra of pristine Se/PAN electrode and the electrodes cycled in the APC-based electrolyte and the  $\text{Mg}(\text{BH}_4)_2$ -based electrolyte at  $400 \text{ mA g}^{-1}$ .

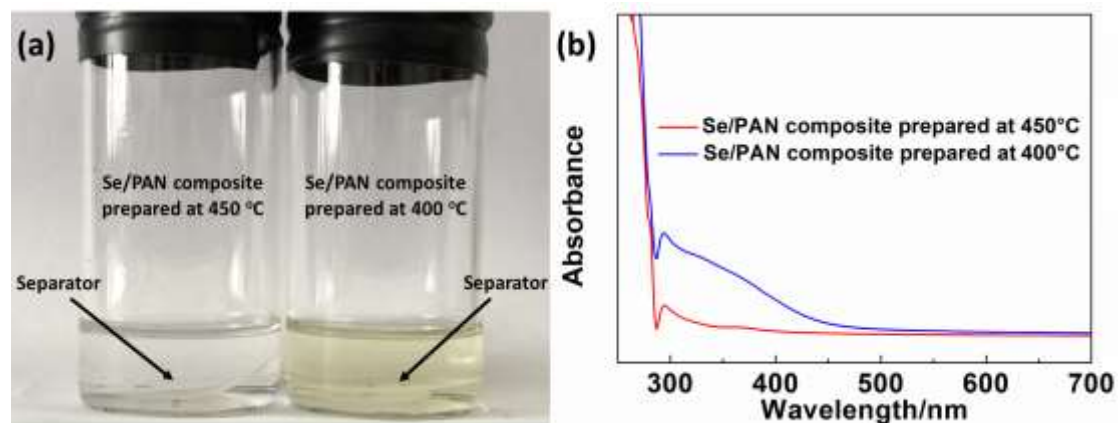

Figure S16. (a) Photo (a) and UV-Vis spectra (b) of THF solutions soaking separators collected from the cycled Mg-Se/PAN cells with  $0.4 \text{ mol L}^{-1} (\text{PhMgCl})_2\text{-AlCl}_3 + 1 \text{ mol L}^{-1} \text{LiCl/THF}$  electrolyte after three cycles at  $100 \text{ mA g}^{-1}$ , Se/PAN composites were prepared at  $400 \text{ }^\circ\text{C}$  and  $450 \text{ }^\circ\text{C}$  for 10h with 8:1 weight ratio of Se and PAN, respectively.

Table S1. The fitting values of the resistance shown in Fig. 7.

|                                                             | Fresh       |             | after 2 cycles |             | after 20 cycles |             |
|-------------------------------------------------------------|-------------|-------------|----------------|-------------|-----------------|-------------|
|                                                             | $R_e$ (ohm) | $R_1$ (ohm) | $R_e$ (ohm)    | $R_1$ (ohm) | $R_e$ (ohm)     | $R_1$ (ohm) |
| (PhMgCl) <sub>2</sub> -AlCl <sub>3</sub><br>+LiCl/THF       | 16.33       | 33.94       | 15.65          | 29.03       | 17.72           | 43.96       |
| (MgBH <sub>4</sub> ) <sub>2</sub> +LiBH <sub>4</sub><br>/TG | 64.57       | 27.09       | 61.91          | 60.82       | 75.93           | 193.40      |

Table S2. Comparison of cycling and rate performance of Mg-Se batteries reported in the literatures with this work.

| Cathode material                | Se content (wt%) | Electrolyte                                                                                                                                   | Cycling performance                                                       |                                                                            | Rate performance                                    |                                                                 | Ref.      |
|---------------------------------|------------------|-----------------------------------------------------------------------------------------------------------------------------------------------|---------------------------------------------------------------------------|----------------------------------------------------------------------------|-----------------------------------------------------|-----------------------------------------------------------------|-----------|
|                                 |                  |                                                                                                                                               | Current density (mA g <sup>-1</sup> <sub>Se</sub> )                       | Final discharge capacity (mAh g <sup>-1</sup> <sub>Se</sub> )/cycle number | Current density (mA g <sup>-1</sup> <sub>Se</sub> ) | Average discharge capacity (mAh g <sup>-1</sup> <sub>Se</sub> ) |           |
| Se/CMK-3                        | 50               | 0.9 mol L <sup>-1</sup><br>(HMDS) <sub>2</sub> Mg-(AlCl <sub>3</sub> ) <sub>2</sub> +0.9 mol L <sup>-1</sup><br>MgCl <sub>2</sub> /TG+DG(1:1) | 2 C                                                                       | 100/50                                                                     | /                                                   | /                                                               | 1         |
| Se/Disordered mesoporous carbon | 50               | 0.5 mol L <sup>-1</sup> THFPB+0.05 mol L <sup>-1</sup> MgF <sub>2</sub> /DME                                                                  | 66 mA g <sup>-1</sup><br>(≈0.1 C)                                         | 361/200                                                                    | 1000 mA g <sup>-1</sup><br>(≈1.5 C)                 | 405                                                             | 2         |
| Se/C nanostructures             | 75               | 0.5 mol L <sup>-1</sup> THFPB+0.05 mol L <sup>-1</sup> MgF <sub>2</sub> /DME                                                                  | 0.1 C                                                                     | 607.1/60                                                                   | /                                                   | /                                                               | 3         |
| Se/PAN composite                | 45.37            | 0.4 mol L <sup>-1</sup><br>(PhMgCl) <sub>2</sub> -AlCl <sub>3</sub> +1 mol L <sup>-1</sup> LiCl/THF                                           | 220 mA g <sup>-1</sup><br>(≈0.32 C)<br>880 mA g <sup>-1</sup><br>(≈1.3 C) | 415.2/100<br>260.7/800                                                     | 1100 mA g <sup>-1</sup><br>(≈1.64 C)                | 355.5                                                           | This work |

Table S3. FTIR wavenumbers ( $\text{cm}^{-1}$ ) and assignments for Fig. S15.

| Wavenumbers ( $\text{cm}^{-1}$ ) | Assignments                                           |
|----------------------------------|-------------------------------------------------------|
| 1498                             | C=C Stretch <sup>4</sup>                              |
| 1400                             | C=C Stretch <sup>5</sup>                              |
| 1240                             | C=N Stretch <sup>4</sup>                              |
| 1170                             | C-N Stretch                                           |
| 834                              | C-N Stretch <sup>6</sup>                              |
| 873                              | C-Se Stretch <sup>5</sup>                             |
| 795                              | Ring Breath (Main-chain Hexahydric-ring) <sup>4</sup> |

**References:**

- 1 Z. Zhao-Karger, X.-M. Lin, C. B. Minella, D. Wang, T. Diemant, R. J. Behm and M. Fichtner, *J. Power Sources*, 2016, **323**, 213–219.
- 2 Z. H. Zhang, Z. L. Cui, L.X. Qiao, J. Guan, H. M. Xu, X. G. Wang, P. Hu, H. P. Du, S. Z. Li, X. H. Zhou, S. M. Dong, Z.H. Liu and G. L. Cui, *Adv. Energy Mater.*, 2017, **7**, 1602055.
- 3 Z. H. Zhang, B. B. Chen, H. M. Xu, Z. L. Cui, S. M. Dong, A. B Du, J. Ma, Q. F. Wang, X. H. Zhou and G. L. Cui, *Adv. Funct. Mater.*, 2018, **28**, 1701718.
- 4 S. Y. Wei, L. Ma, K. E. Hendrickson, Z. Y. Tu and L. A. Archer, *J. Am. Chem. Soc.*, 2015, **137**, 12143-12152.
- 5 Z. Iqbal, S. T. Correale, F. Reidinger, R. H. Baughman and Y. Okamoto, *J. Chem. Phys.*, 1988, **88**, 4492-4497.
- 6 L. C. Zeng, X. Wei, J. Q. Wang, Y. Jiang, W. H. Li and Y. Yu, *J. Power Sources*, 2015, **281**, 461–469.
